# Supplementary material for: Properties and phase morphology of cellulose/aromatic polysulfonamide alloy fibers regulated by the viscosity ratio of solution
Source: Springer Nature journal article supplement (doi:10.1007/s10570-017-1605-2), 2017-12-11
Supplement: MOESM1 [file 15295026]

*Supporting Information*

**Properties and phase morphology of cellulose/aromatic polysulfonamide alloy fibers regulated by the viscosity ratio of solution**

Kaijian Wu1, Jinchao Yu1, Jiaqing Yang2, Shenghui Chen3, Xiaofeng Wang3, Yumei Zhang1*, Huaping Wang1

（*1 Key Laboratory of High Performance Fibers & Products, Ministry of Education, College of Materials Science and Engineering, Donghua University, Shanghai, China, 201620; 2 Shanghai Fire Research Institute of MPS,* *200032, China; 3 Shanghai Tanlon Fiber Co., Ltd, Shanghai, 201419, China*)

*corresponding author: zhangym@dhu.edu.cn Tel/Fax: 0086-21-67792957

**Experimental Section**

The FTIR spectra of cellulose/PSA alloy fibers were recorded on a spectrometer (Nicolet 6700, Thermo Fisher) at ambient temperature, the spectra were recorded at the average of 32 scans in the wavenumber range of 600-4000 cm-1 at a resolution of 4 cm-1.

The scanning electron microscope (SEM) of the cellulose/PSA alloy fibers was taken on a scanning electron microscope (Hitachi S-3000 N, Japan). The cross-section of the sample was sputtered with gold. After cryogenically breaking the blends, the microscope was used to observe the cross-section.

**Additional Results**

Fig. S1 shows the FTIR spectrum of cellulose/PSA alloy fibers. The broad absorption peak at 3341 cm-1 was assigned to -OH groups stretching vibration of cellulose. The FT-IR spectrum of PSA fibers shows the characteristic peaks of 3318 cm-1 (-NH groups stretching vibration), 1660 cm-1 (C=O groups stretching vibration), 1500-1540 cm-1 (-NH bending and C-N stretching vibration), 1147 cm-1 and 1316 cm-1 (-SO2- asymmetric and symmetric stretching vibration) (Li et al. 2012). The FTIR spectrum of cellulose/PSA alloy fibers exhibit peaks of the same positions with pure cellulose and PSA as shown in Fig. S1, which indicated that there are little interactions between cellulose and polysulfonamide chains. The flame retardant, hygroscopic and mechanical properties of cellulose/PSA alloy fibers were only correlate with the phase morphology.





Fig. S1 FTIR spectrum of whole composition range cellulose/PSA alloy fibers

Fig. S2 showed the cross-section morphology of the cellulose/PSA alloy fibers observed by SEM. The prepared fibers appeared an almost round profile and revealed no significant differences in the morphology of the fiber cross-section. Unfortunately, we were unable to identify the phase morphology from the SEM pictures taken.


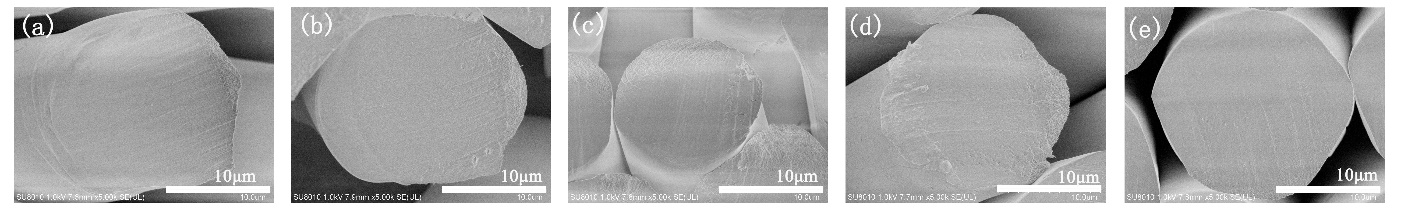


Fig. S2 SEM images of whole composition range cellulose/PSA alloy fibers: **(a)** Cell/PSA (100/0), **(b)** Cell/PSA (70/30), **(c)** Cell/PSA (50/50), **(d)** Cell/PSA (30/70), **(e)** Cell/PSA (0/100)

**References**

Li HM, Zhu Y, Xu B, Wu CX, Zhao JX, Dai MX (2012) Preparation and Characterization of All Para-Position Polysulfonamide Fiber. J Appl Polym Sci 127 (1) :342-348

Liu L, Wang WT, Xiao CF (2010) Preparation and Characterization of Polysulfonamide Statistical Copolymers from Three Aromatic Diamines. J Shanghai Jiaotong Univ (Sci) 15(1): 114-118
